# Supplementary material for: Role of Poly(ADP-Ribose) Polymerase (PARP) Enzyme in the Systemic Acquired Acclimation Induced by Light Stress in Phaseolus vulgaris L. Plants
Source: Plants (Basel). 2022 Jul 18;11(14):1870. doi: 10.3390/plants11141870 (PMC9316121; doi:10.3390/plants11141870)
Supplement: Supplementary file 1 [file plants-11-01870-s001.zip › plants-1788015-supplementary.pdf]

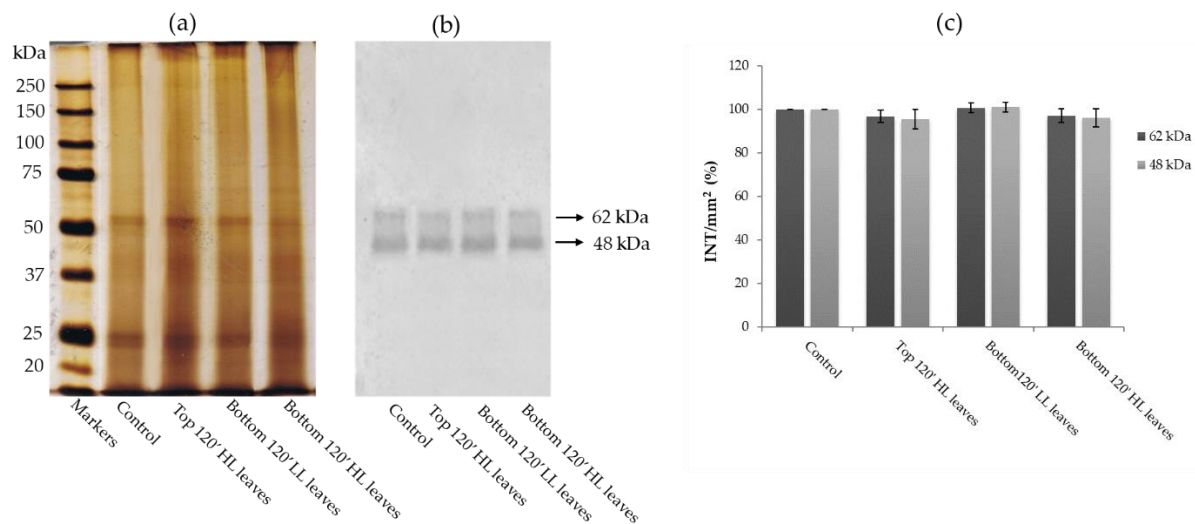

**Figure S1.** 10% SDS-PAGE (a), immunoblotting with anti-PARPH250 antibodies (b) and percentual densitometric analysis of 62 kDa and 48 kDa signals (c): Control (nuclear fraction of leaves Control); Top 120' HL leaves (nuclear fraction of "inducing" leaves stressed for 120'); Bottom LL (nuclear fraction of unstressed "receiving" leaves for 120'); Bottom 120' HL leaves (nuclear fraction of "receiving" leaves stressed for 120'). The bars represent the mean ( $\pm$  SE) of the INT/mm<sup>2</sup> (%) of each sample compared to the control, considered 100%. No statistically significant percentage difference was observed among all examined nuclear fractions ( $p \leq 0.05$ ) using the Mann-Whitney U test.

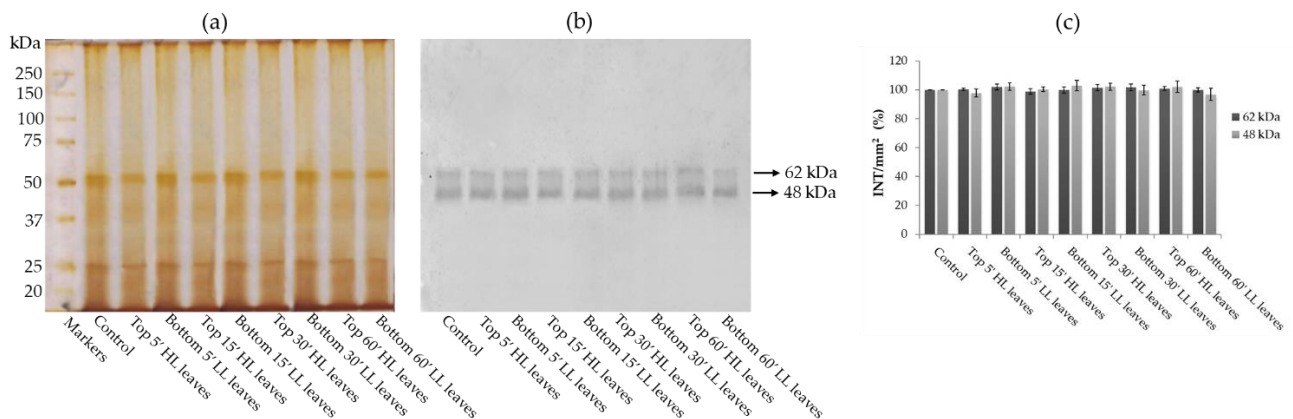

**Figure S2.** 10% SDS-PAGE (a) immunoblotting with anti-PARP H250 antibodies (b) and percentual densitometric analysis of 62 kDa and 48 kDa signals (c) of Control, Top and Bottom leaves at different timing of stress: Control - nuclear fractions of unstressed *Phaseolus vulgaris* L. leaves; Top 5' HL leaves - nuclear fraction of "inducing" leaves after 5' stress; Bottom 5' LL leaves (nuclear fraction of unstressed "receiving" leaves); Top 15' HL leaves - nuclear fraction of "inducing" leaves after 15' stress; Bottom 15' LL leaves - nuclear fraction of unstressed "receiving" leaves; Top 30' HL leaves (nuclear fraction of "inducing" leaves after 30' stress); Bottom 30' LL leaves - nuclear fraction of unstressed "receiving" leaves; Top 60' HL leaves - nuclear fraction of "inducing" leaves after 1h stress; Bottom 60' LL leaves - nuclear fraction of unstressed "receiving" leaves). The bars represent the mean ( $\pm$  SE) of the INT/mm<sup>2</sup> (%) of each sample compared to the control,

considered 100%. No statistically significant percentage difference was observed among all examined nuclear fractions ( $p \leq 0.05$ ) using the Mann-Whitney U test.
